# Supplementary material
Source: Research Square preprint supplement (doi:10.21203/rs.3.rs-8980130/v1)
Supplement: Supplementary file 1 [file 257c530c544ab140127d0c46.docx]

## 1. LogisticRegression

Hyperparameters:

- Regularization factor (C): 0.01
- ElasticNet mixing parameter (l1_ratio): None
- Maximum iterations (max_iter): 50
- Regularization type (penalty): l2
- Solver: lbfgs
- Tolerance for convergence (tol): 0.0001

## 2. XGBClassifier

Hyperparameters:

- Subsample ratio of columns for tree (colsample_bytree): 1
- Learning rate: 0.1
- Maximum tree depth (max_depth): 8
- Minimum sum of instance weight (hessian) needed in a child (min_child_weight): 4
- Number of base learners (n_estimators): 20
- L2 regularization term on weights (reg_lambda): 0.5
- Subsample ratio of the training instances (subsample): 1

## 3. LGBMClassifier

Hyperparameters:

- Boosting type: gbdt
- Learning rate: 2
- Maximum tree depth (max_depth): 20
- Maximum number of trees (n_estimators): 5
- Maximum number of leaves in one tree (num_leaves): 5

## 4. GaussianNB

Hyperparameters:

- Variance smoothing (var_smoothing): 1e-07

## 5. MLPClassifier

Hyperparameters:

- Activation function: logistic
- L2 regularization coefficient (alpha): 0.0001
- Batch size: auto
- Hidden layer sizes: (10, 10)
- Learning rate type: constant
- Initial learning rate (learning_rate_init): 0.001
- Maximum iterations (max_iter): 20
- Solver: adam
- Tolerance for convergence (tol): 0.0001

## 6. SVC (Support Vector Classifier)

Hyperparameters:

- Regularization parameter (C): 1.0
- Kernel coefficient for 'rbf', 'poly' and 'sigmoid' (gamma): scale
- Kernel type: rbf
- Maximum iterations (max_iter): 50
- Enable probability estimates (probability): True
- Tolerance for stopping criterion (tol): 0.001
