# Supplementary material
Source: Research Square preprint supplement (doi:10.21203/rs.3.rs-8980130/v1)
Supplement: Supplementary file 2 [file 7bf408a5ecd9ef3cfce42984.docx]

| **Table 1 Performance Evaluation of Models on Training Set** | | | | | | | | | |
| --- | --- | --- | --- | --- | --- | --- | --- | --- | --- |
|  | **AUC**  **(95%CI)** | **Cutoff**  **(95%CI)** | **Accuracy**  **(95%CI)** | **Sensitivity**  **(95%CI)** | **Specificity**  **(95%CI)** | **Positive Predictive Value**  **(95%CI)** | **Negative Predictive Value**  **(95%CI)** | **F1 score**  **(95%CI)** | **Kappa**  **(95%CI)** |
| logistic | 0.820 (0.776-0.864) | 0.547(0.537-0.557) | 0.761(0.755-0.766) | 0.769(0.741-0.796) | 0.751(0.724-0.777) | 0.794(0.781-0.806) | 0.727(0.709-0.744) | 0.78(0.770-0.790) | 0.518(0.508-0.528) |
| XGBoost | 0.965 (0.947-0.982) | 0.565(0.544-0.585) | 0.911(0.904-0.918) | 0.906(0.891-0.921) | 0.917(0.902-0.931) | 0.931(0.921-0.942) | 0.888(0.873-0.903) | 0.918(0.911-0.925) | 0.82(0.806-0.834) |
| LightGBM | 0.777 (0.727-0.827) | 0.393(0.247-0.539) | 0.77(0.750-0.791) | 0.828(0.798-0.858) | 0.699(0.640-0.757) | 0.777(0.745-0.809) | 0.77(0.744-0.796) | 0.8(0.783-0.816) | 0.531(0.487-0.575) |
| GNB | 0.813 (0.767-0.858) | 0.273(0.212-0.334) | 0.759(0.756-0.763) | 0.784(0.755-0.813) | 0.729(0.698-0.760) | 0.783(0.769-0.798) | 0.734(0.717-0.752) | 0.782(0.774-0.791) | 0.513(0.507-0.519) |
| MLP | 0.728 (0.676-0.780) | 0.507(0.467-0.547) | 0.694(0.665-0.723) | 0.755(0.681-0.828) | 0.618(0.509-0.727) | 0.72(0.685-0.755) | 0.684(0.648-0.720) | 0.729(0.698-0.760) | 0.375(0.309-0.441) |
| SVM | 0.755 (0.705-0.806) | 0.639(0.606-0.672) | 0.705(0.683-0.727) | 0.737(0.664-0.809) | 0.665(0.593-0.737) | 0.738(0.708-0.769) | 0.684(0.643-0.724) | 0.73(0.695-0.765) | 0.402(0.361-0.444) |
| **Table 2 Performance Evaluation of Models on Validation Set** | | | | | | | | | |
|  | **AUC**  **(95%CI)** | **Cutoff**  **(95%CI)** | **Accuracy**  **(95%CI)** | **Sensitivity**  **(95%CI)** | **Specificity**  **(95%CI)** | **Positive Predictive Value**  **(95%CI)** | **Negative Predictive Value**  **(95%CI)** | **F1 score**  **(95%CI)** | **Kappa**  **(95%CI)** |
| logistic | 0.812 (0.675-0.949) | 0.547(0.537-0.557) | 0.731(0.697-0.765) | 0.733(0.671-0.796) | 0.729(0.666-0.793) | 0.774(0.734-0.815) | 0.696(0.656-0.737) | 0.748(0.709-0.787) | 0.46(0.393-0.526) |
| XGBoost | 0.875 (0.768-0.975) | 0.565(0.544-0.585) | 0.788(0.730-0.846) | 0.785(0.714-0.855) | 0.793(0.721-0.866) | 0.827(0.765-0.889) | 0.757(0.682-0.831) | 0.802(0.746-0.858) | 0.574(0.457-0.691) |
| LightGBM | 0.750 (0.595-0.905) | 0.393(0.247-0.539) | 0.737(0.684-0.790) | 0.784(0.733-0.836) | 0.678(0.574-0.783) | 0.762(0.695-0.828) | 0.718(0.661-0.775) | 0.768(0.724-0.813) | 0.464(0.353-0.574) |
| GNB | 0.803 (0.658-0.948) | 0.273(0.212-0.334) | 0.739(0.713-0.765) | 0.758(0.698-0.817) | 0.716(0.644-0.788) | 0.773(0.743-0.804) | 0.714(0.674-0.754) | 0.761(0.733-0.788) | 0.473(0.420-0.525) |
| MLP | 0.708 (0.544-0.872) | 0.507(0.467-0.547) | 0.641(0.584-0.698) | 0.686(0.559-0.814) | 0.588(0.434-0.741) | 0.682(0.613-0.752) | nan(NaN-NaN) | 0.666(0.586-0.746) | 0.273(0.160-0.386) |
| SVM | 0.700 (0.528-0.872) | 0.639(0.606-0.672) | 0.646(0.602-0.691) | 0.678(0.583-0.773) | 0.608(0.516-0.699) | 0.688(0.633-0.743) | 0.625(0.553-0.697) | 0.673(0.619-0.727) | 0.286(0.200-0.372) |

| **Table 3 Performance Evaluation of Models on Test Set** | | | | | | | | | |
| --- | --- | --- | --- | --- | --- | --- | --- | --- | --- |
|  | **AUC(95%CI)** | **cutoff** | **Accuracy** | **Sensitivity** | **Specificity** | **Positive Predictive Value** | **Negative Predictive Value** | **F1 score** | **Kappa** |
| XGBoost | 0.893 (0.829-0.956) | 0.597 | 0.804 | 0.765 | 0.848 | 0.848 | 0.765 | 0.804 | 0.609 |
