# Supplementary material
Source: Research Square preprint supplement (doi:10.21203/rs.3.rs-8980130/v1)
Supplement: Supplementary file 3 [file 8a0c35ca6c57f399925f06d1.docx]

| **Variable** | **Coefficient at minimum MSE** | **Coefficient at 1-SE of minimum MSE** |
| --- | --- | --- |
| (Intercept) | -12.566 | 3.764 |
| Gender | 0.095 | 0.055 |
| Smoking | 0.656 | 0.239 |
| Hypertension | 0.058 | 0 |
| Diabetes | 0 | 0 |
| Coronary | 0 | 0 |
| Age | 0.013 | 0 |
| BMI | 0 | 0 |
| Duration_of_fever | -0.129 | -0.094 |
| Peak_temperature | 0.395 | 0 |
| CRP | 0.003 | 0 |
| ESR | -0.01 | -0.002 |
| PCT | 0.058 | 0 |
| WBC | 0 | 0 |
| HGB | 0.019 | 0.015 |
| Hct | 0.001 | 0 |
| PLT | 0.002 | 0 |
| Lym | 0 | 0 |
| Mono | 0 | 0 |
| Neut | 0 | 0 |
| EOS | -0.023 | 0 |
| RDW | 0.055 | 0 |
| PT | 0 | 0 |
| APTT | -0.001 | 0 |
| FIB | 0 | 0 |
| TT | -0.186 | -0.147 |
| AST | -0.001 | 0 |
| ALT | 0.004 | 0 |
| TB | -0.019 | 0 |
| ALB | 0.039 | 0 |
| AISI | 0 | 0 |
| SII | 0 | 0 |
| SIRI | 0 | 0 |
| NLR | -0.003 | 0 |
| PLR | -0.001 | 0 |
| HRR | 0 | 0 |
| RAR | 0 | 0 |
| MLR | 0 | 0 |
| ANLR | -0.001 | 0 |
| CLR | 0 | 0 |
